# Supplementary material for: Dual functionalized brain-targeting nanoinhibitors restrain temozolomide-resistant glioma via attenuating EGFR and MET signaling pathways
Source: PubMed Central journal article supplement (PMC6992617; doi:10.1038/s41467-019-14036-x), 2020-01-30
Supplement: 41467_2019_14036_MOESM1_ESM.pdf [file 41467_2019_14036_MOESM1_ESM.pdf]

SUPPLEMENTARY INFORMATION

Dual functionalized brain-targeting nanoinhibitors restrain temozolomide resistant glioma via  
attenuating EGFR and MET signaling pathways

Meng et al.

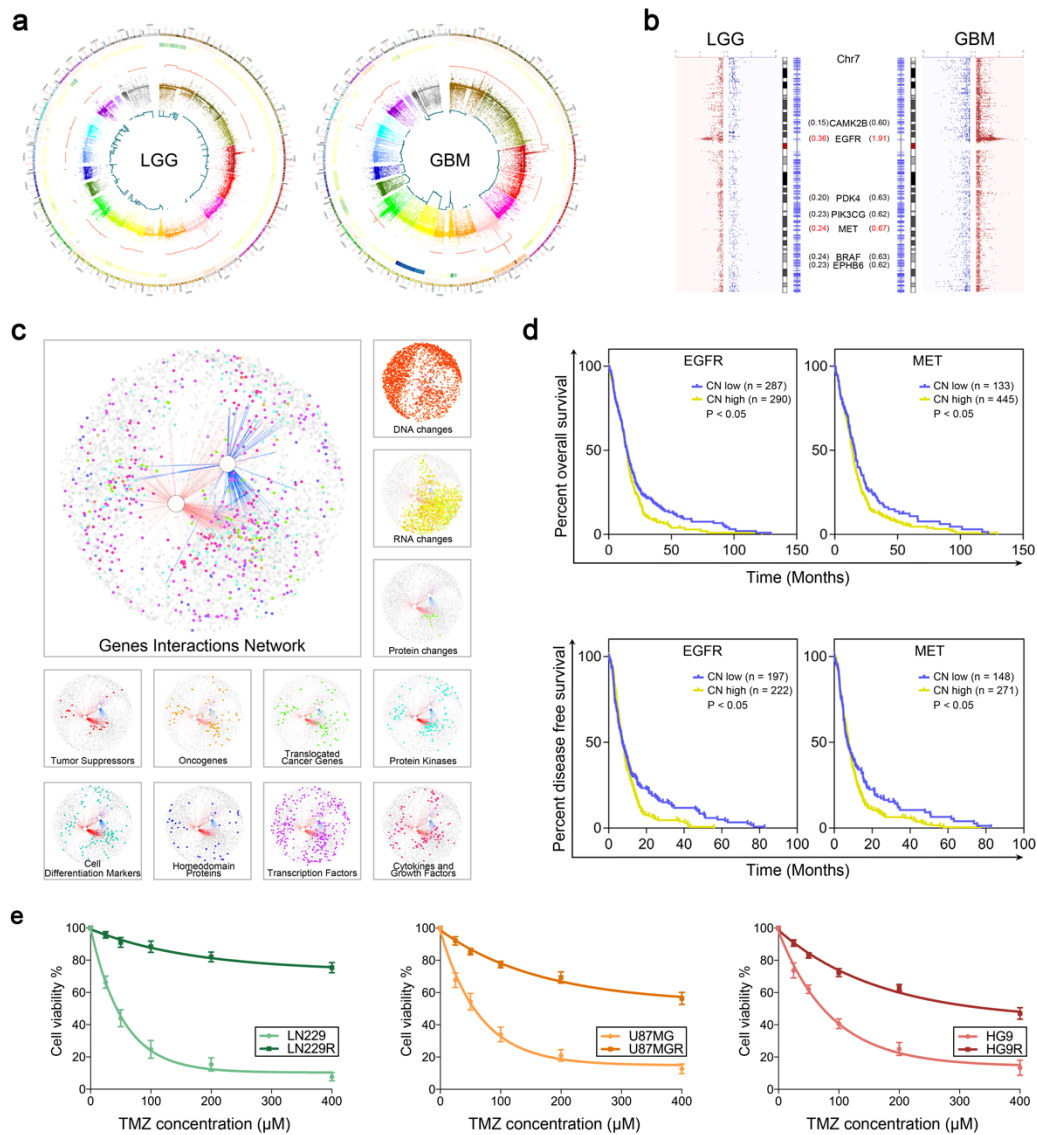

**Supplementary Figure 1. The amplifications of EGFR and MET are associated with many genomic, transcriptomic and proteomic changes in gliomas.**

(a) The genomic copy number variations of LGG and GBM. (b) The top seven amplification of RTK genes in LGG and GBM. (c) The EGFR and MET amplifications were simultaneously associated with a number of genomic variations, differential gene expression and protein profiling regulation. (d) The overall survival and progression free survival of patients with different EGFR and MET copy numbers. P value is determined by log-rank test. (e) The IC<sub>50</sub> of TMZ in LN229, LN229R, U87MG, U87MGR, HG9 and HG9R (n = 6). The error bars represent the S.D. of six measurements.

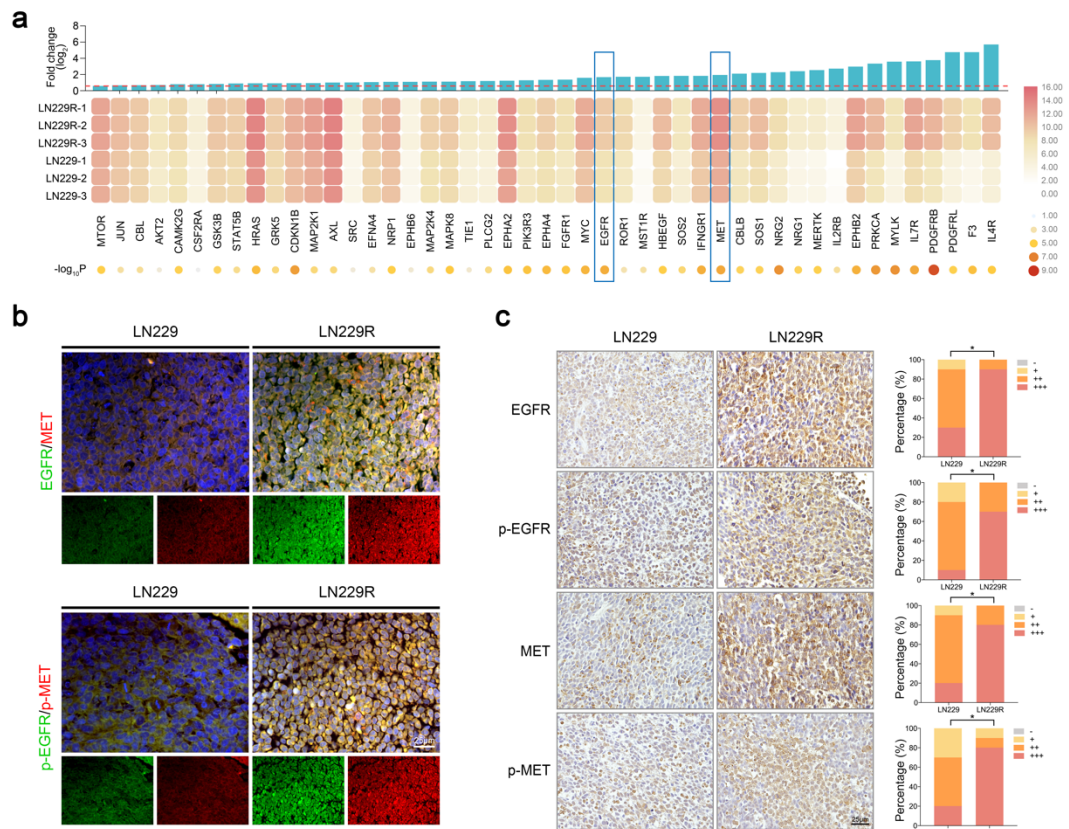

**Supplementary Figure 2. The overactivation of EGFR and MET signaling pathways in TMZ resistant gliomas.**

**(a)** The differential expressed RTK genes between LN229 and LN229R cells. **(b)** The immunofluorescence assay of EGFR, MET, p-EGFR and p-MET in glioma tissues derived from LN229 and LN229R, respectively. Scale bar = 25  $\mu$ m. **(c)** The immunohistochemistry assay of EGFR, MET, p-EGFR and p-MET in glioma tissues derived from LN229 and LN229R, respectively. Scale bar = 25  $\mu$ m. P value is determined by Chi-squared test. Significant results are presented as \* $P < 0.05$ .

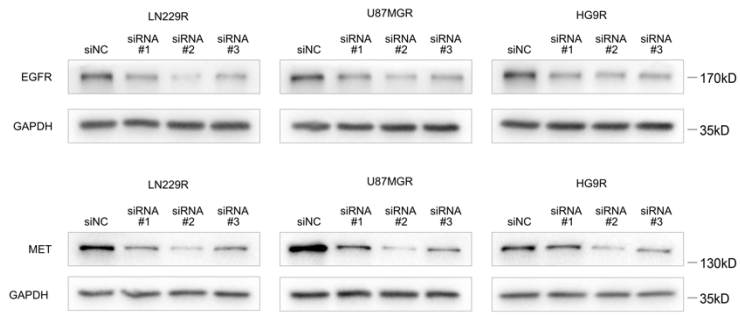

**Supplementary Figure 3. The validation of siRNAs targeting EGFR and MET by Western blot.**

The Western blot validation of EGFR and MET knocked down by siRNAs.

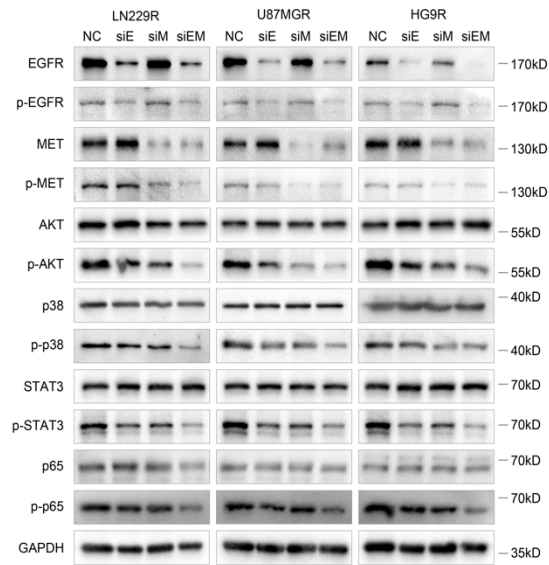

**Supplementary Figure 4. The protein expression of EGFR and MET signaling pathways with siRNAs targeting EGFR or MET.**

The Western blot assay of protein expression of EGFR and MET signaling pathways with siRNAs targeting EGFR or MET.

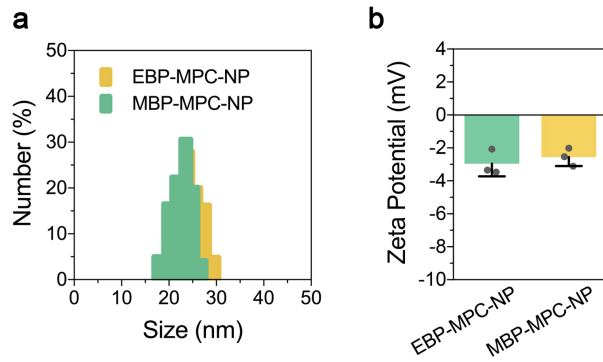

**Supplementary Figure 5. The physical characteristics of EBP-MPC-NP and MBP-MPC-NP.**

**(a)** The dynamic light scattering (DLS) measurements of EBP-MPC-NP and MBP-MPC-NP. **(b)** The zeta potential data of EBP-MPC-NP and MBP-MPC-NP ( $n = 3$ ). The error bars represent the S.D. of three measurements.

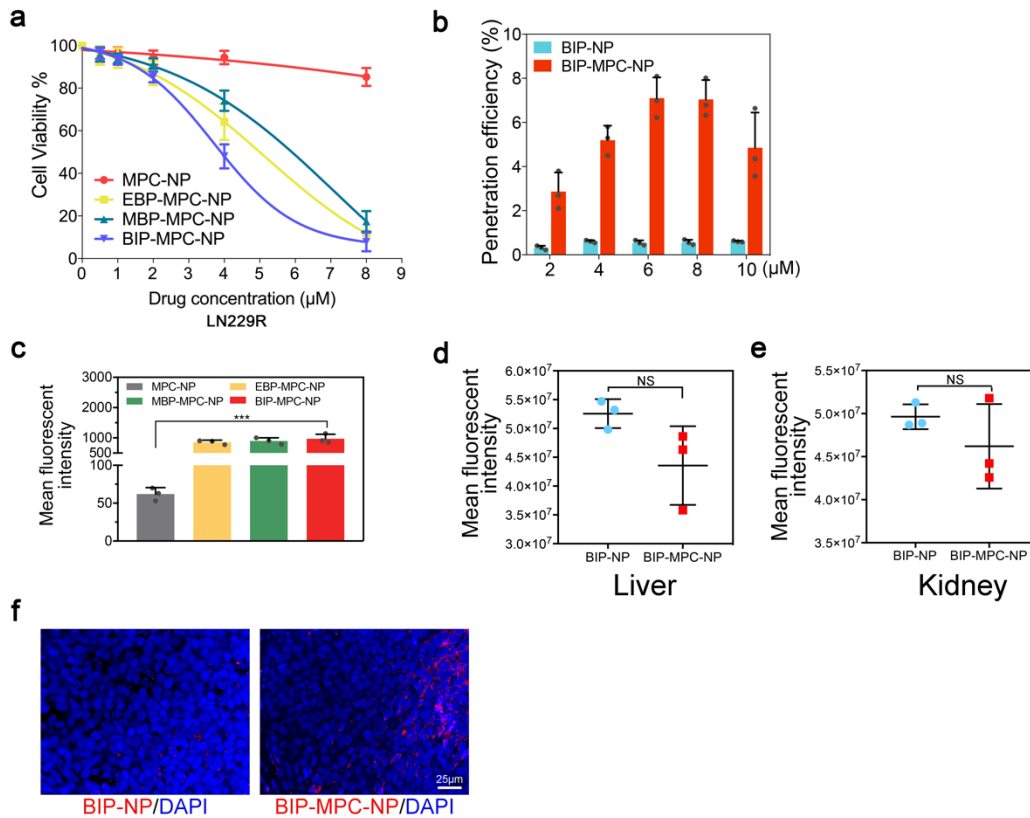

**Supplementary Figure 6. The distribution of nanoinhibitors after penetrating BBB models *in vitro* and *in vivo*.**

**(a)** The IC<sub>50</sub> of MPC-NP, EBP-MPC-NP, MBP-MPC-NP and BIP-MPC-NP at 24 hours in LN229R (n = 6). **(b)** The transportation assays showed the permeability of BIP-NP and BIP-MPC-NP with different concentrations *in vitro*. **(c)** The flow cytometric analysis of cells with MPC-NP, EBP-MPC-NP, MBP-MPC-NP or BIP-MPC-NP after penetrating BBB model *in vitro* (n = 3). **(d-e)** The mean fluorescent intensity of BIP-NP and BIP-MPC-NP distributing in liver and kidney (n = 3). **(f)** The tumor tissue sliced distributions indicating a higher penetration of BIP-MPC-NP than that of BIP-NP within tumors. Scale bar = 25 µm. The error bars represent the S.D. of three or six measurements. P value is determined by Student's *t*-test. Significant results are presented as NS non-significant, \*\*\*P < 0.001.

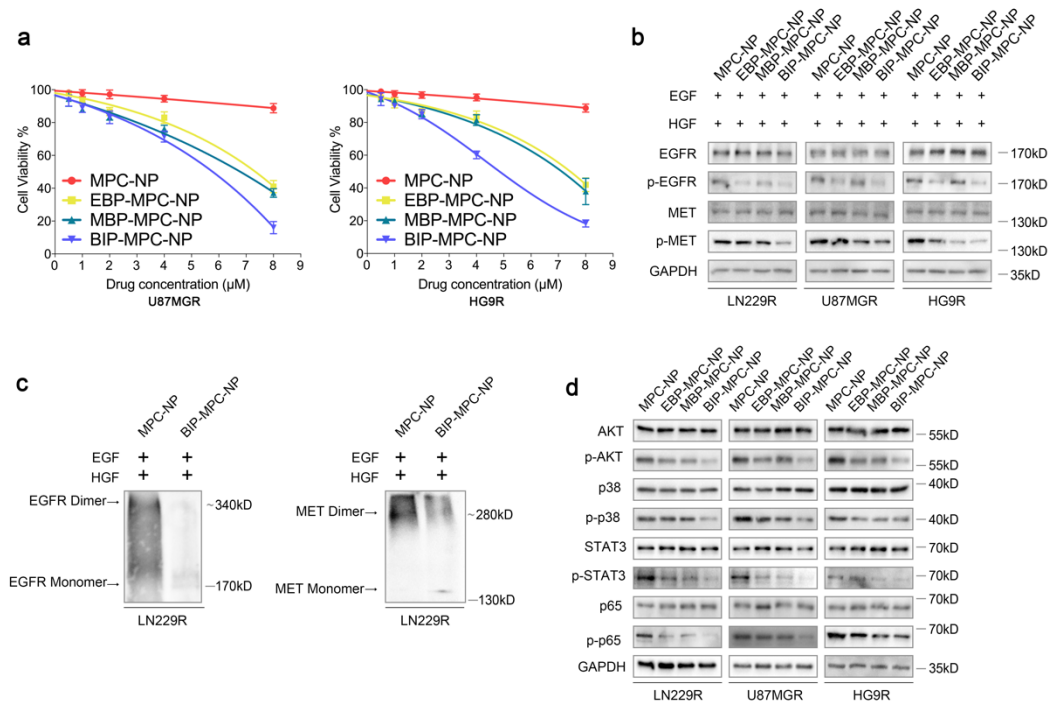

**Supplementary Figure 7. The effect and the specificity of nanoinhibitors by Western blot.**

(a) The IC<sub>50</sub> of MPC-NP, EBP-MPC-NP, MBP-MPC-NP and BIP-MPC-NP at 24 hours in U87MGR and HG9R (n = 6). The error bars represent the S.D. of six measurements. (b) The EGFR, p-EGFR, MET and p-MET expression in TMZ resistant glioma cells treated with different nanoinhibitors in EGF and HGF dependent manners. (c) The levels of EGFR and MET dimers in TMZ resistant glioma cells treated with BIP-MPC-NP and with EGF and HGF. (d) The protein levels of EGFR and EMT signaling pathways in TMZ resistant glioma cells treated with nanoinhibitors.



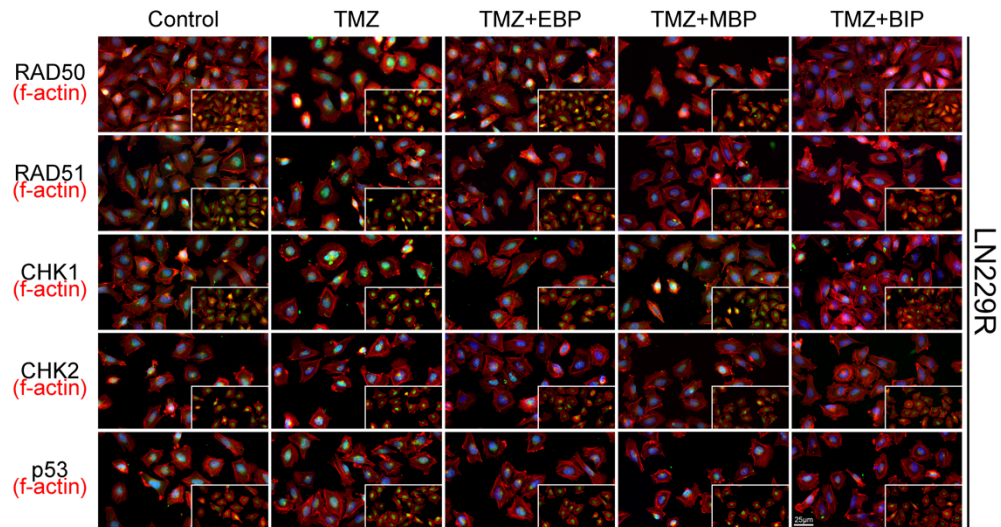

**Supplementary Figure 8. The immunofluorescence of DNA damage repair modules in LN229R treated with TMZ and different nanoinhibitors.**

The immunofluorescence of RAD50, RAD51, CHK1, CHK2 and p53 in LN229R treated with TMZ and different nanoinhibitors. Scale bar = 25  $\mu$ m.

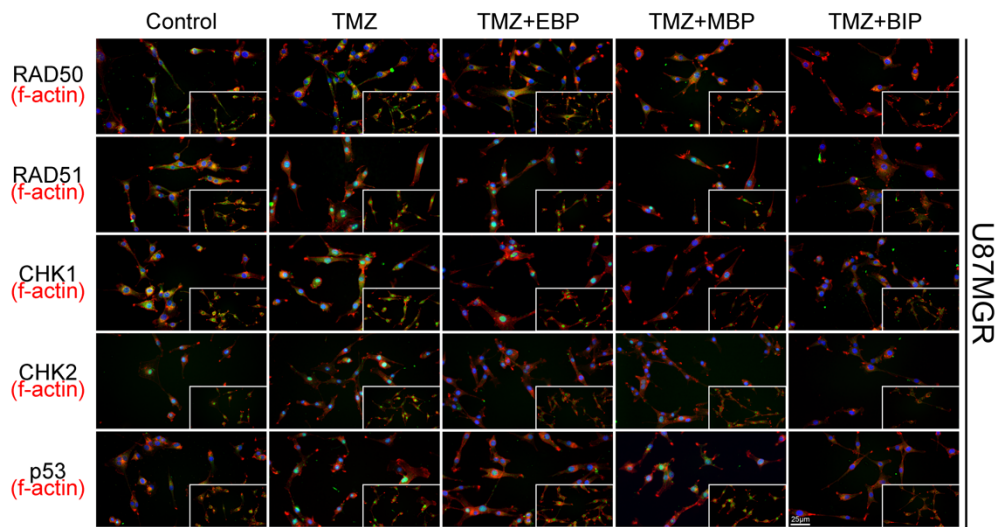

**Supplementary Figure 9. The immunofluorescence of DNA damage repair modules in U87MGR cells treated with TMZ and different nanoinhibitors.**

The immunofluorescence of RAD50, RAD51, CHK1, CHK2 and p53 in U87MGR treated with TMZ and different nanoinhibitors. Scale bar = 25  $\mu$ m.

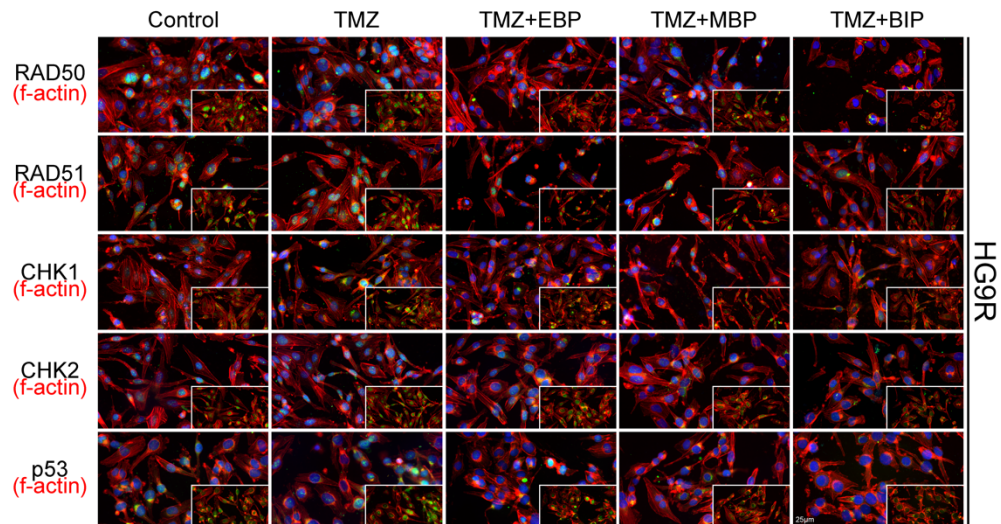

**Supplementary Figure 10. The immunofluorescence of DNA damage repair modules in HG9R cells treated with TMZ and different nanoinhibitors.**

The immunofluorescence of RAD50, RAD51, CHK1, CHK2 and p53 in HG9R treated with TMZ and different nanoinhibitors. Scale bar = 25  $\mu$ m.

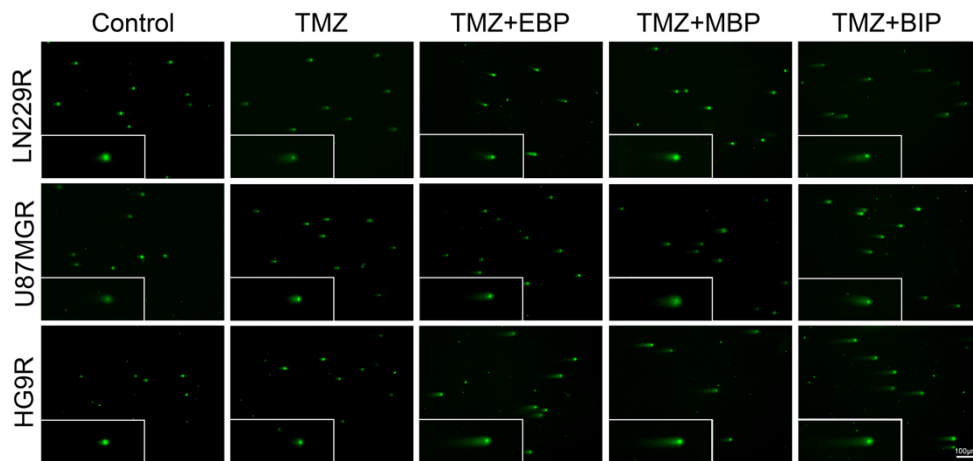

**Supplementary Figure 11. The comet assay of TMZ resistant glioma cells with TMZ and different nanoinhibitors.**

The comet assay of LN229R, U87MGR and HG9R treated with TMZ and different nanoinhibitors.

Scale bar = 100 µm.

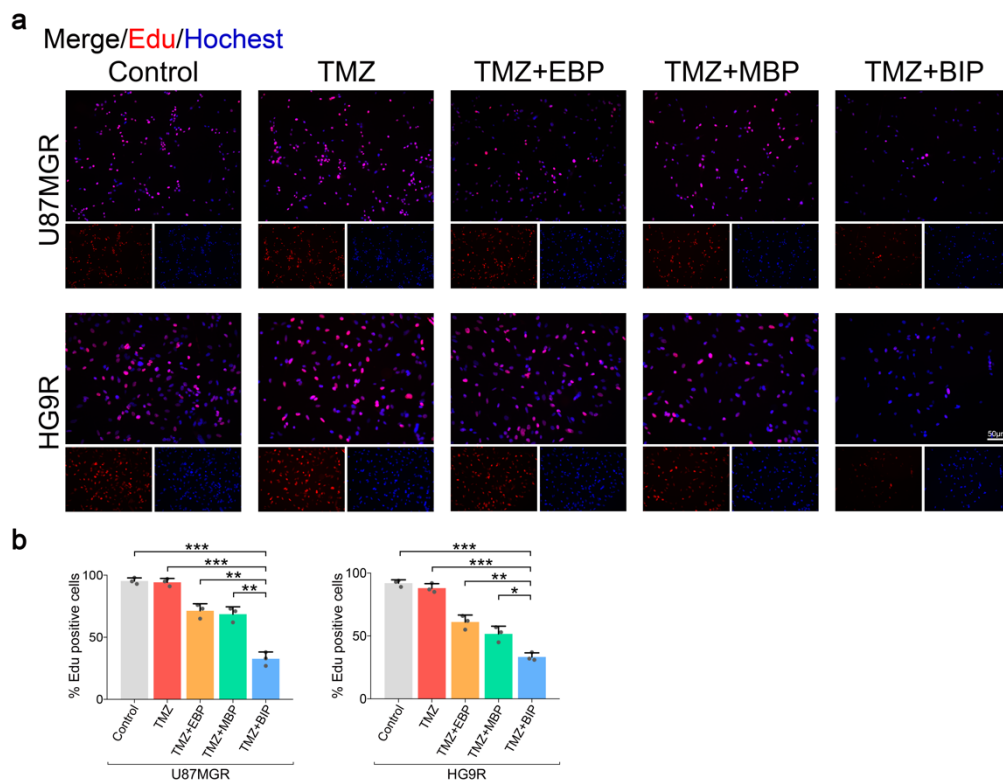

**Supplementary 12. The EdU assays of U87MGR and HG9R treated with TMZ and different nanoinhibitors.**

**(a)** The EdU assays of U87MGR and HG9R treated with TMZ and different nanoinhibitors. Scale bar = 50  $\mu$ m. **(b)** The statistic of the EdU assays (n = 3). The error bars represent the S.D. of three measurements. P value is determined by Student's *t*-test. Significant results are presented as \*P < 0.05, \*\*P < 0.01, \*\*\*P < 0.001.

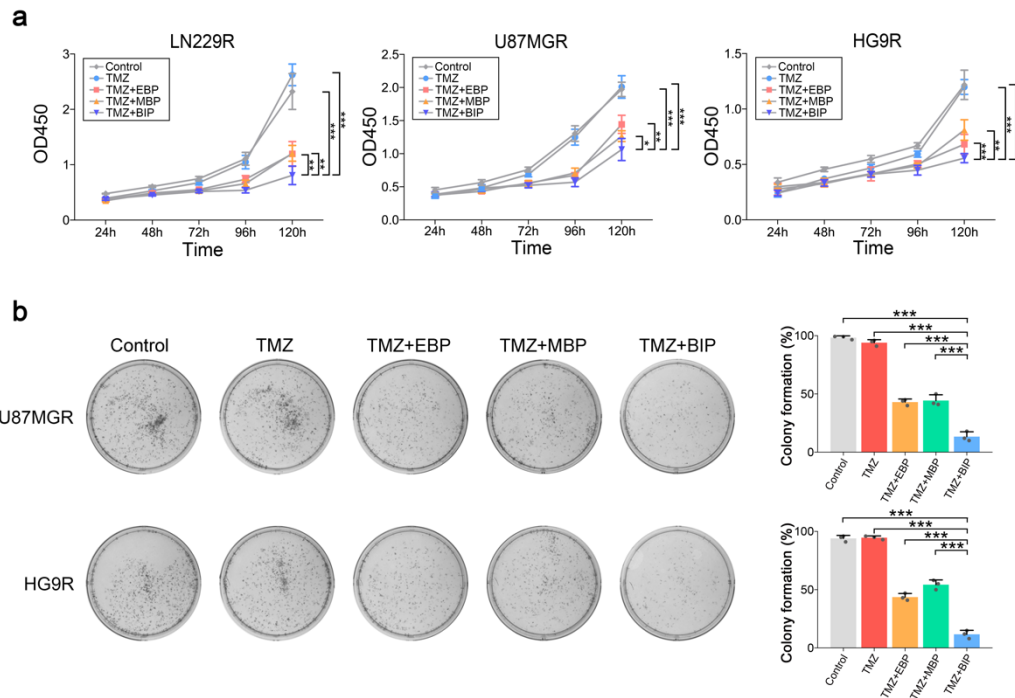

**Supplementary Figure 13. The proliferation inhibition of cells treated with TMZ and different nanoinhibitors.**

(a) The CCK-8 proliferation assays of LN229R, U87MGR and HG9R cells treated with TMZ and different nanoinhibitors (n = 6). (b) The colony formation assay of U87MGR and HG9R cells treated with TMZ and different nanoinhibitors. The histogram displayed the statistics of colony formation assays (n = 3). The error bars represent the S.D. of three or six measurements. P value is determined by Student's *t*-test. Significant results are presented as \*P < 0.05, \*\*P < 0.01, \*\*\*P < 0.001.

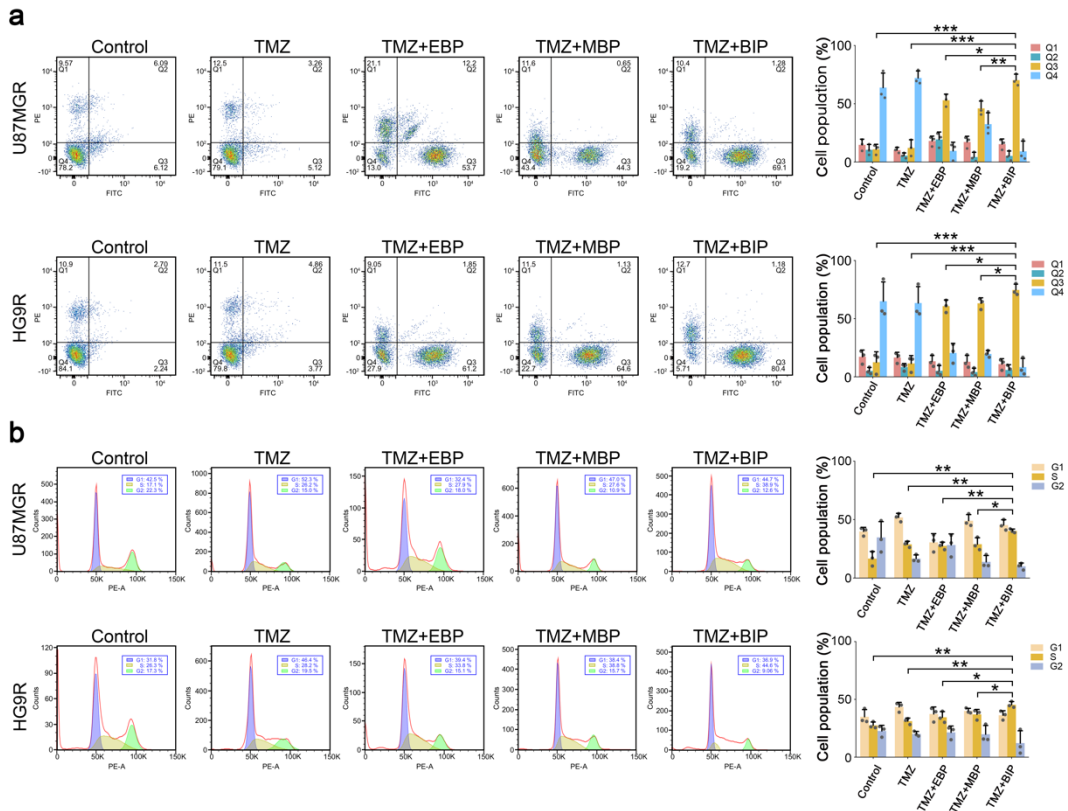

**Supplementary Figure 14. The cell apoptosis assay and cell cycle analysis of U87MGR and HG9R cells treated with TMZ and different nanoinhibitors.**

(a) The cell apoptosis assay of U87MGR and HG9R cells treated with TMZ and different nanoinhibitors and the statistic in histogram (n = 3). (b) The cell cycle analysis of U87MGR and HG9R cells treated with TMZ and different nanoinhibitors and the statistics in histogram (n = 3). The error bars represent the S.D. of three measurements. P value is determined by Student's *t*-test. Significant results are presented as \*P < 0.05, \*\*P < 0.01, \*\*\*P < 0.001.

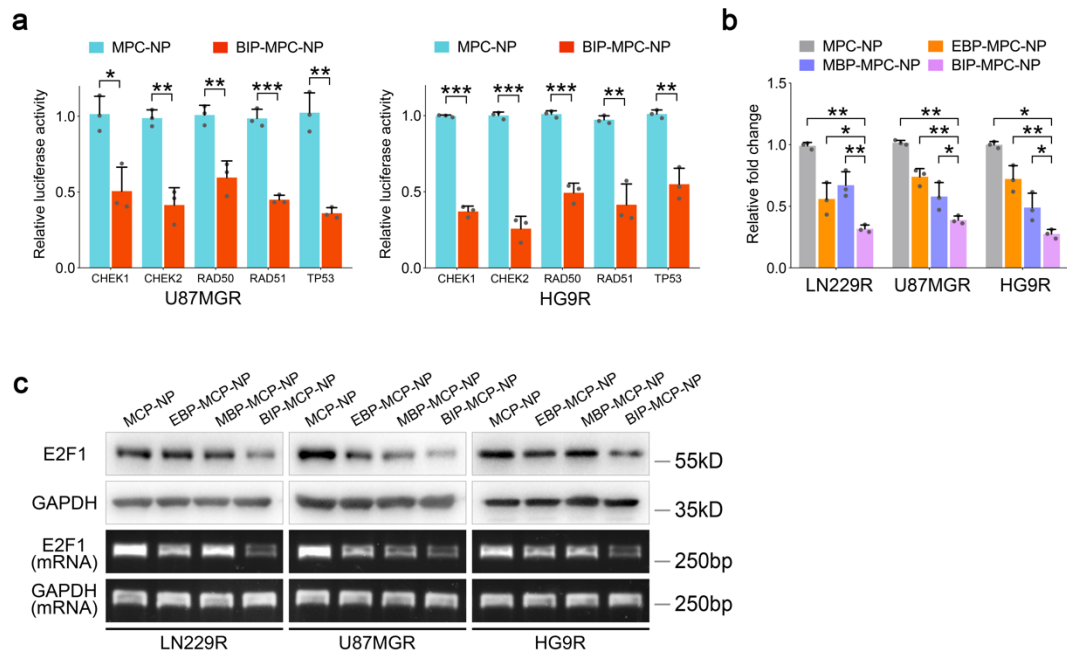

**Supplementary Figure 15. The inhibition of *E2F1* expression and transcriptional activity on DNA damage repair modules by nanoinhibitors.**

(a) The luciferase reporter assays representing the different E2F1 transcriptional activity on the promoter regions of *CHEK1*, *CHEK2*, *RAD50*, *RAD51* and *TP53* in U87MGR and HG9R cells treated with MPC-NP or BIP-MPC-NP (n = 3). (b) The E2F1 mRNA level in LN229R, U87MGR and HG9R treated with different nanoinhibitors (n = 3). (c) The E2F1 protein expression and mRNA expression in LN229R, U87MGR and HG9R treated with different nanoinhibitors. The error bars represent the S.D. of three measurements. P value is determined by Student's *t*-test. Significant results are presented as \*P < 0.05, \*\*P < 0.01, \*\*\*P < 0.001.



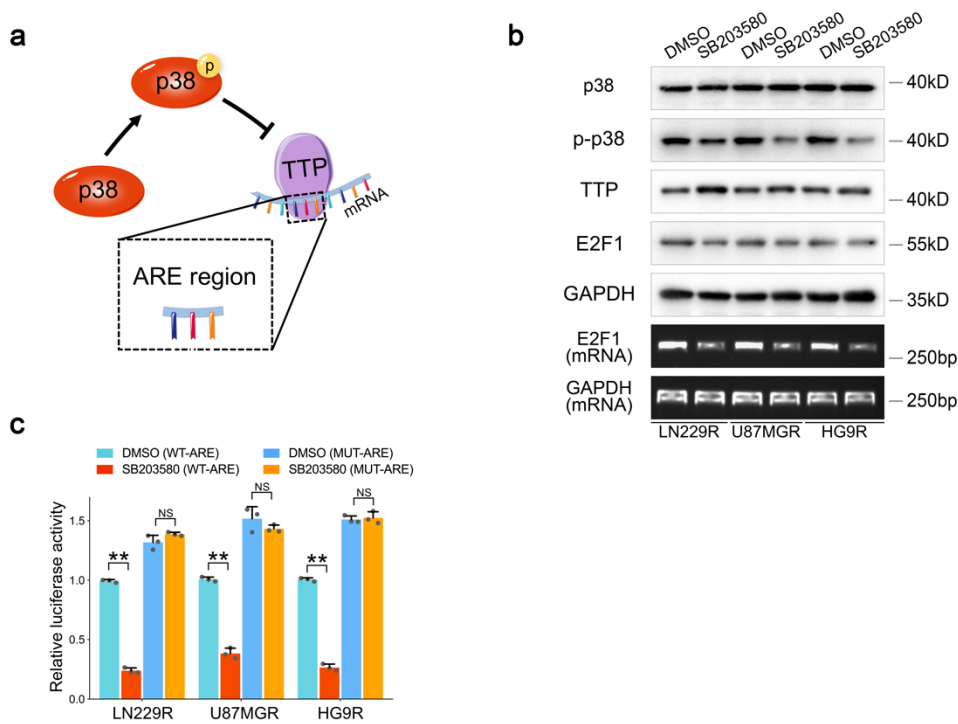

**Supplementary Figure 16. The regulation of E2F1 containing ARE motifs by p-p38 mediated TTP.**

(a) The illustration depicting the regulation of E2F1 containing ARE motifs by p-p38 mediated TTP. (b) The expression of p38, p-p38, TTP and E2F1 (Western blot) and the E2F1 mRNA (PCR) in TMZ resistant glioma cells treated with SB203580. (c) The inhibitory effect of TTP on wild type or mutant type ARE motifs within the E2F1 mRNA 3'-UTR in TMZ resistant glioma cells treated with SB203580 (n = 3). The error bars represent the S.D. of three measurements. P value is determined by Student's *t*-test. Significant results are presented as NS non-significant, \*\*P < 0.01.

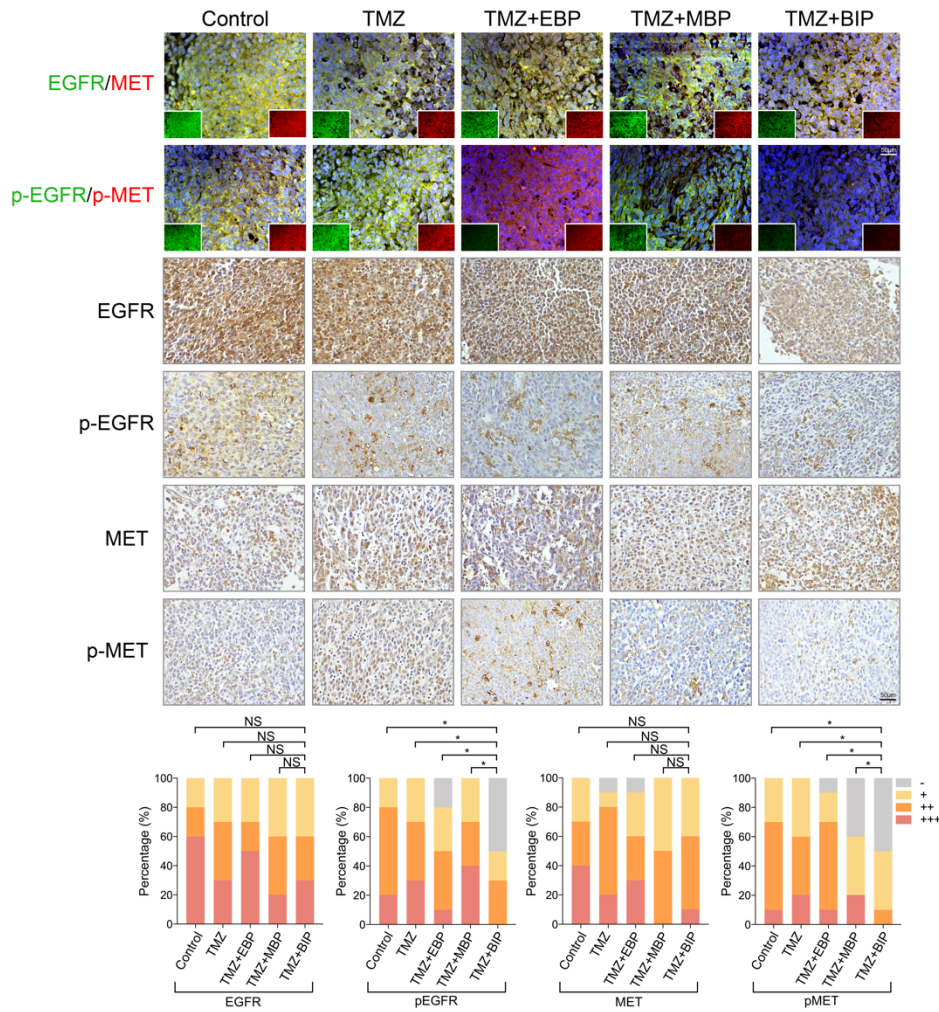

**Supplementary Figure 17. The EGFR, MET, p-EGFR and p-MET expression in xenograft glioma tissues treated with TMZ and different nanoinhibitors.**

The histogram represented the quantitative evaluation of the immunohistochemistry assay. Scale bar = 50  $\mu$ m. P value is determined by Chi-squared test. Significant results are presented as NS non-significant, \*P < 0.05.

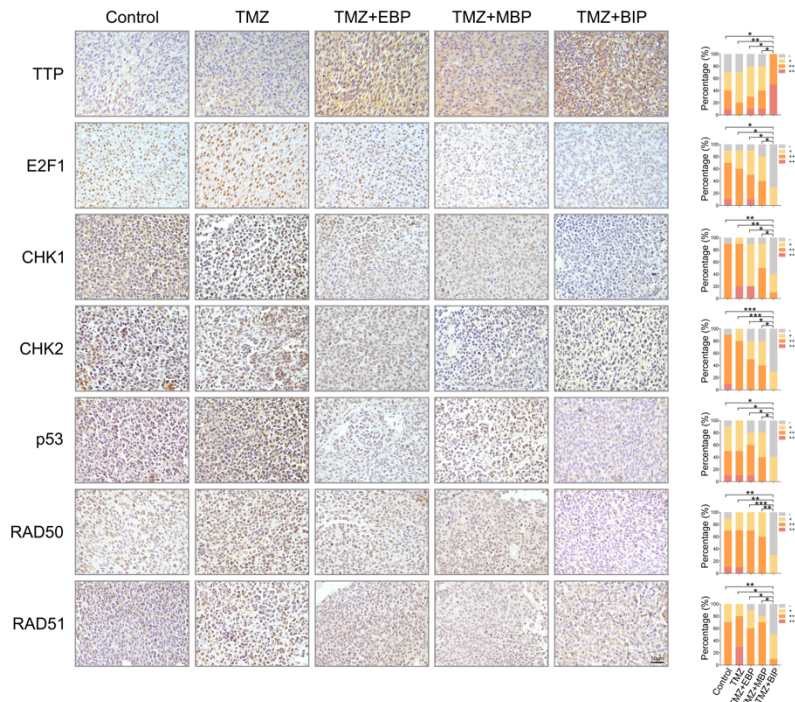

**Supplementary Figure 18. The expression of TTP, E2F1 and DNA damage repair modules in xenograft glioma tissues treated with TMZ and different nanoinhibitors.**

The histogram represented the quantitative evaluation of the immunohistochemistry assay. Scale bar = 50  $\mu\text{m}$ . P value is determined by Chi-squared test. Significant results are presented as \*P < 0.05, \*\*P < 0.01, \*\*\*P < 0.001.

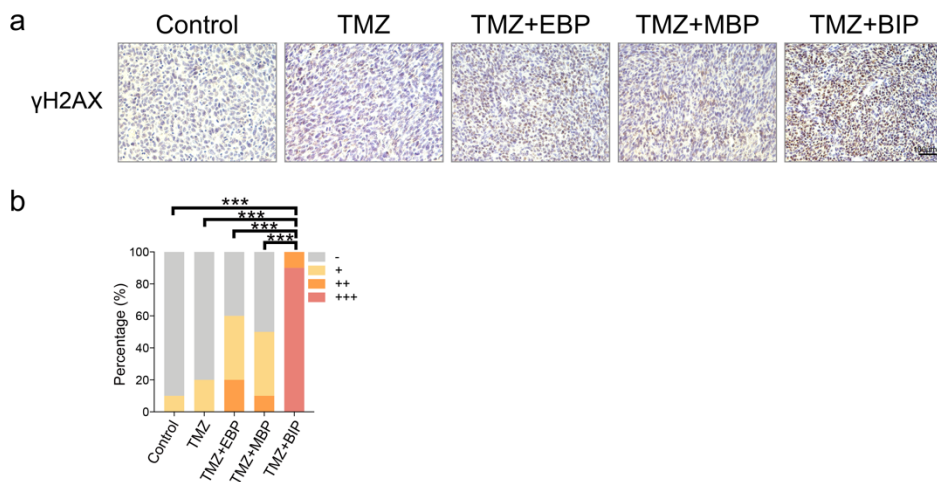

**Supplementary Figure 19. The expression of  $\gamma$ H2AX in xenograft glioma tissues treated with TMZ and different nanoinhibitors.**

(a) The immunohistochemistry of  $\gamma$ H2AX in xenograft glioma tissues treated with TMZ and different nanoinhibitors. Scale bar = 100  $\mu$ m. (b) The histogram represents the quantitative evaluation of the immunohistochemistry assay (n = 10). P value is determined by Chi-squared test. Significant results are presented as \*\*\*P < 0.001

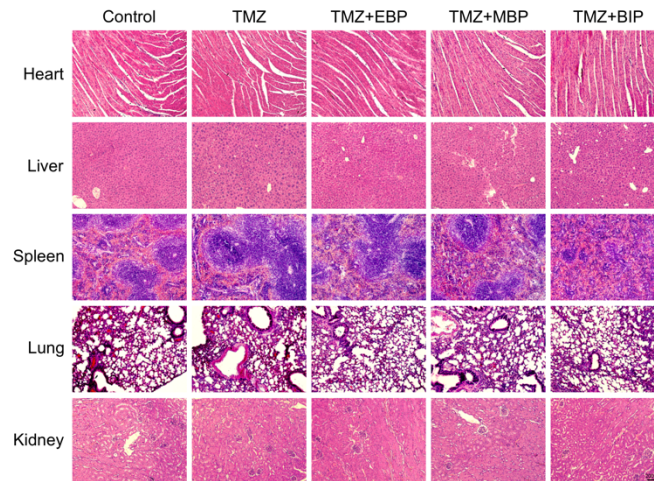

**Supplementary Figure 20. The H&E staining of heart, liver, spleen, lung and kidney tissues in mice treated with TMZ and different nanoinhibitors.**

The H&E staining images showed the heart, liver, spleen, lung and kidney tissues in mice treated with TMZ and different nanoinhibitors. Scale bar = 200  $\mu\text{m}$ .

Figure 3a

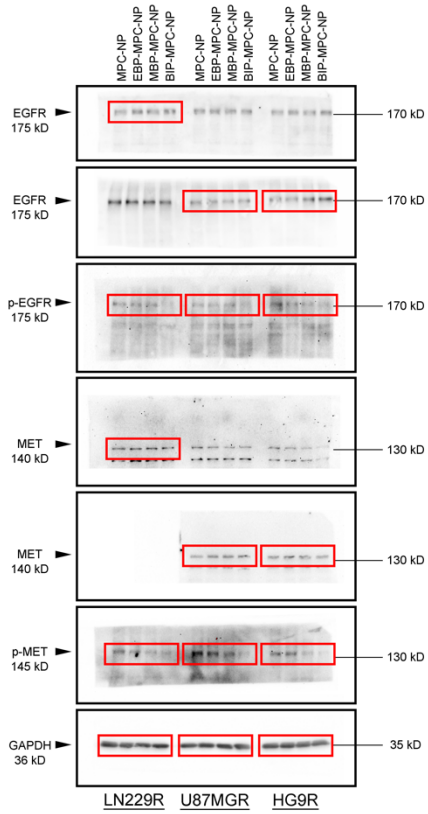

Figure 3b & Supplementary Figure 7c

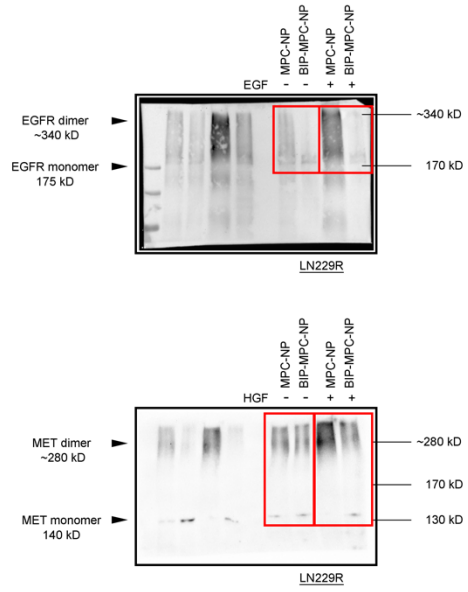

Figure 3d

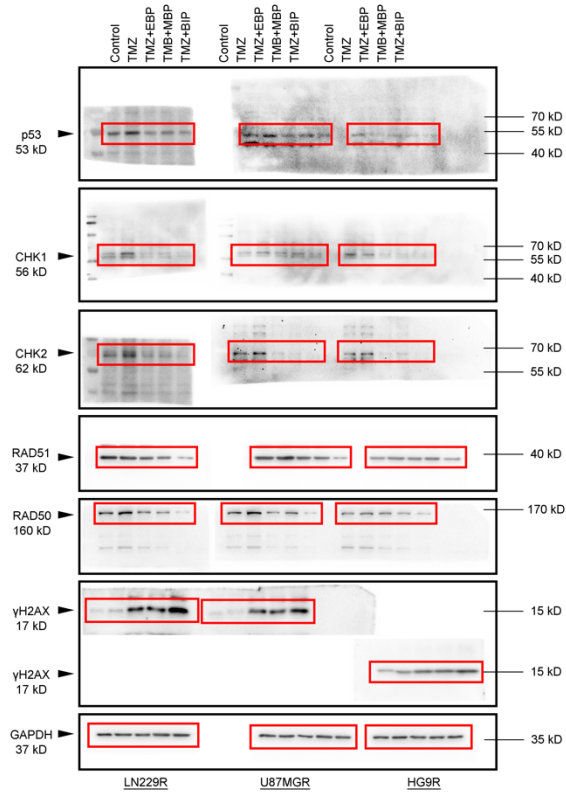

Figure 5b

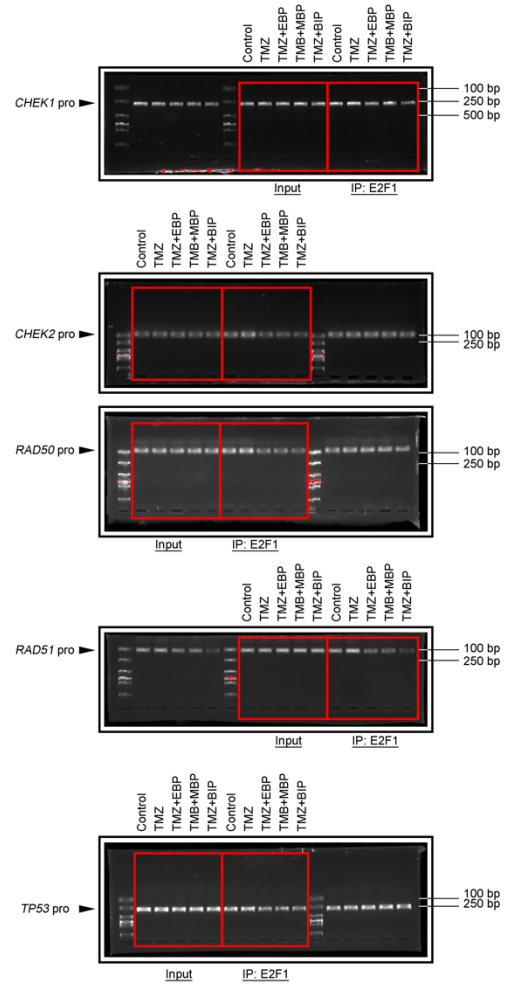

Figure 5d

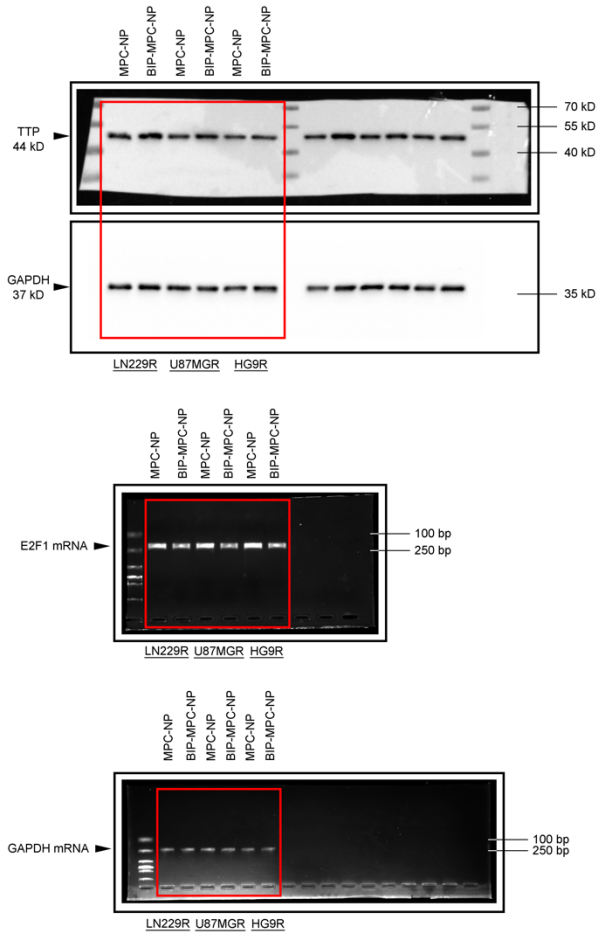

Supplementary Figure 3

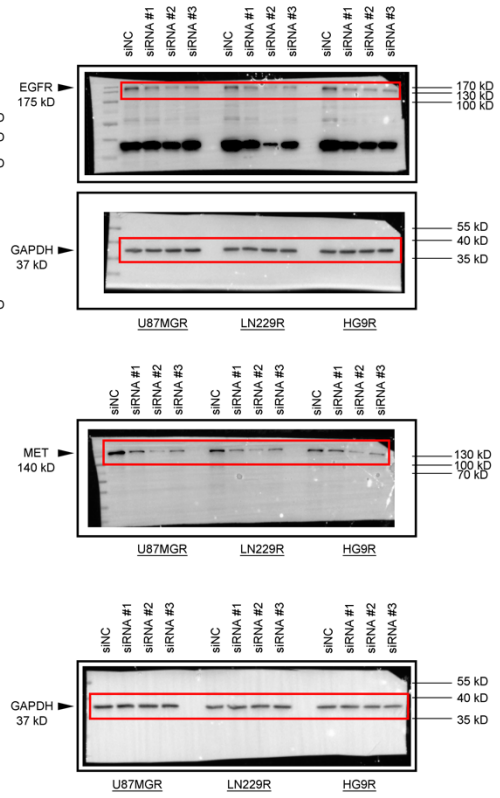



Supplementary Figure 4

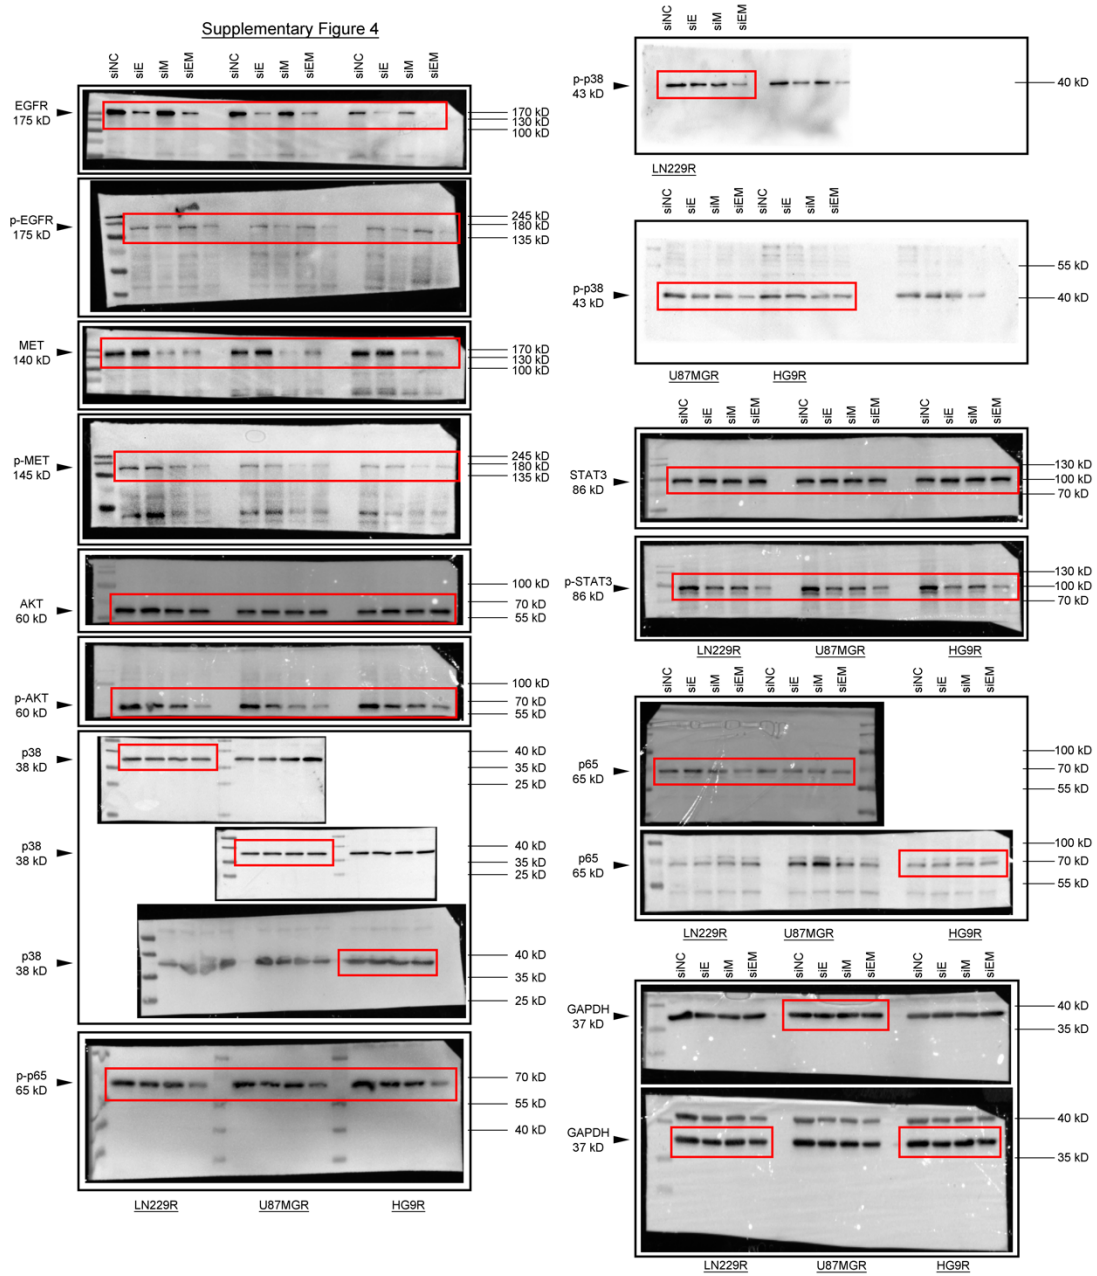

Supplementary Figure 7b & d

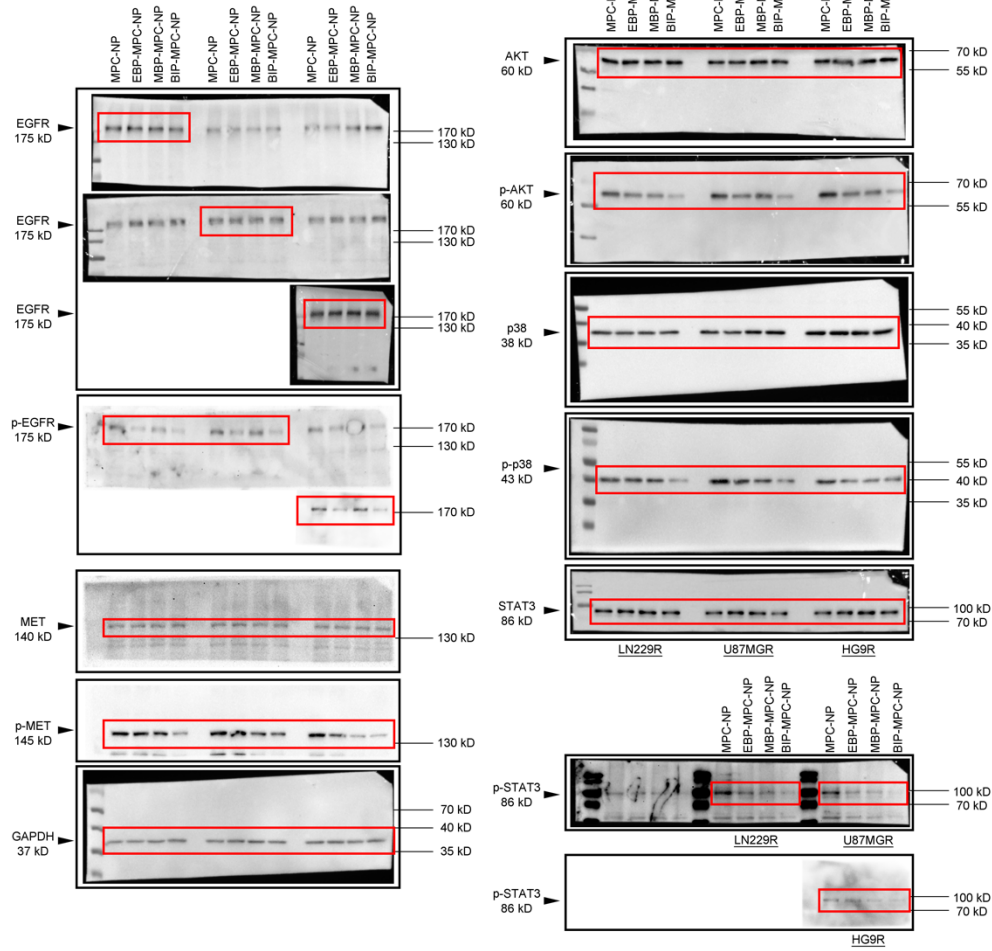

Supplementary Figure 7d

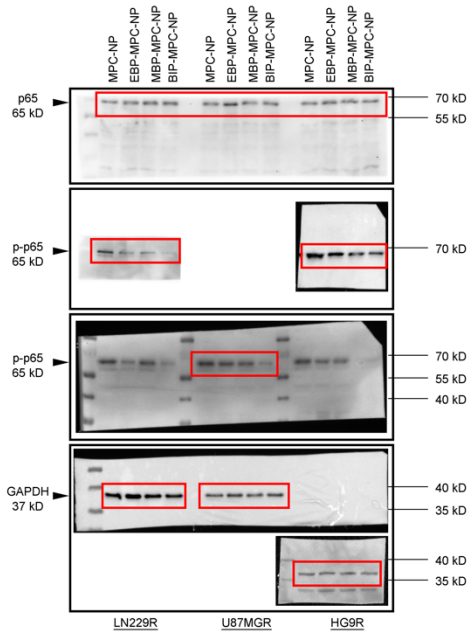

Supplementary Figure 15c

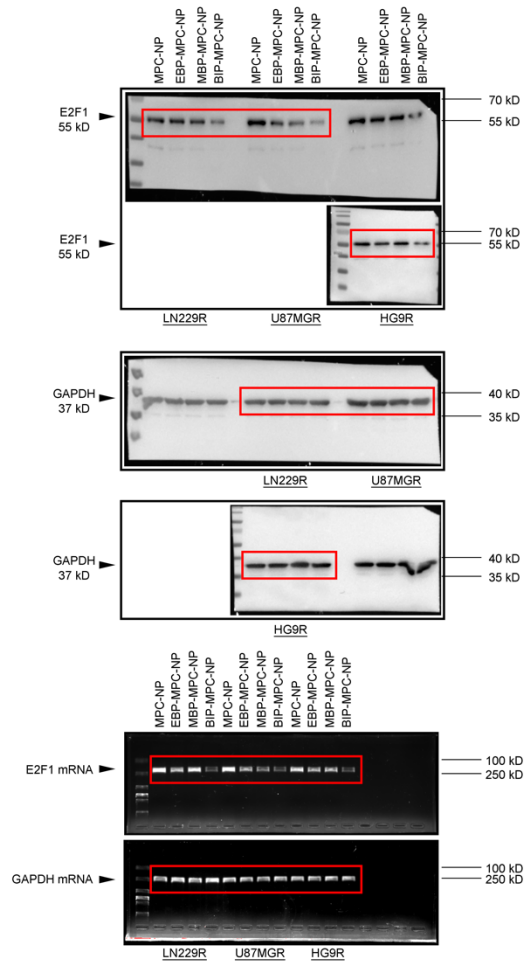

Supplementary Figure 16b

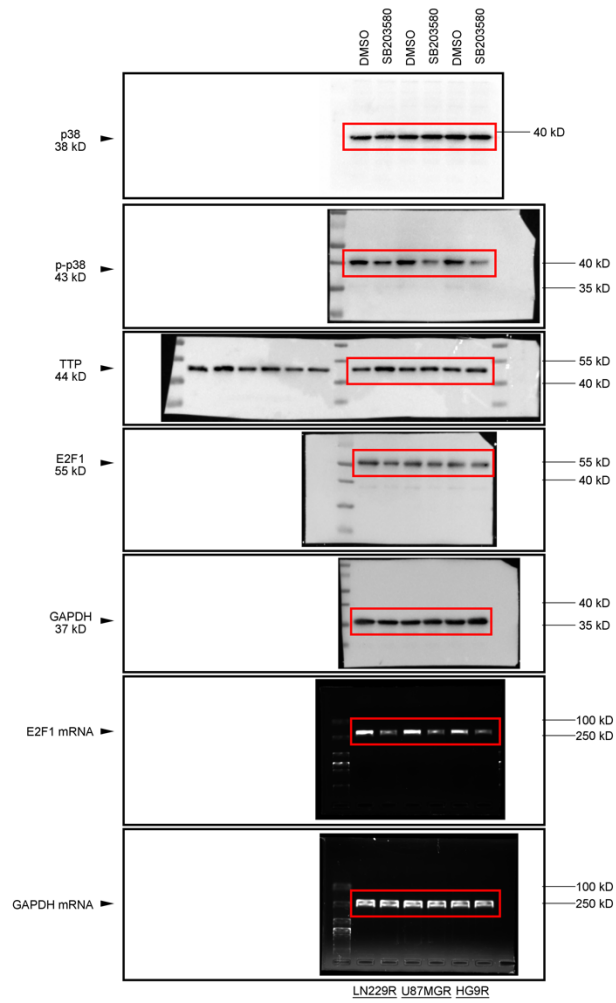

**Supplementary Figure 21. Uncropped blots.**

Uncropped images of all blots shown in main and supplementary figures. Molecular weight markers are indicated on the right side of each blot, whereas predicted molecular weight of the protein of interest indicated by an arrow on the left.

**Supplementary Table 1. The sequences of siRNAs targeting EGFR or MET.**

| <b>Target</b> | <b>Catalog</b> | <b>Sequence</b>                 |
|---------------|----------------|---------------------------------|
| EGFR          | siRNA#1        | 5'-CACAGTGGAGCGAATTCCTTTGGAA-3' |
| EGFR          | siRNA#2        | 5'-GGATCCCAGAAGGTGAGAAAGTTAA-3' |
| EGFR          | siRNA#3        | 5'-CACCGTGGCTTGCATTGATAGAAAT-3' |
| MET           | siRNA#1        | 5'-AGTCCGAGATGAATGTGAATATGAA-3' |
| MET           | siRNA#2        | 5'-CGCTCTAATTCAGAGATAATCTGTT-3' |
| MET           | siRNA#3        | 5'-CCAGTAGCCTGATTGTGCATTTCAA-3' |

**Supplementary Table 2. The DLS and PDI values of nanoinhibitors**

|             | <b>MPC-NP</b> | <b>EBP-MPC-NP</b> | <b>MBP-MPC-NP</b> | <b>BIP-MPC-NP</b> |
|-------------|---------------|-------------------|-------------------|-------------------|
| DLS<br>(nm) | 18.84 ± 1.65  | 24.56 ± 2.29      | 22.67 ± 2.20      | 23.65 ± 2.23      |
| PDI         | 0.18 ± 0.02   | 0.26 ± 0.03       | 0.20 ± 0.04       | 0.26 ± 0.06       |

**Supplementary Table 3. The differential expressed proteins and the gene ontology (GO) analysis.**

| Protein     | Gene Symbol | log <sub>2</sub> FC | -log <sub>10</sub> P | GO analysis                                                                                                                                                                                                                                                                                                                |
|-------------|-------------|---------------------|----------------------|----------------------------------------------------------------------------------------------------------------------------------------------------------------------------------------------------------------------------------------------------------------------------------------------------------------------------|
| MIG6        | ERRFI1      | 1.66                | 8.44                 | Negative_Regulation_Of_Phosphorus_Metabolic_Process//Negative_Regulation_Of_Phosphate_Metabolic_Process                                                                                                                                                                                                                    |
| CMYC        | MYC         | 3.62                | 7.57                 | Regulation_Of_DNA_Metabolic_Process//Regulation_Of_Anatomical_Structure_Morphogenesis                                                                                                                                                                                                                                      |
| CD31        | PECAM1      | 3.89                | 6.95                 | Signal_Transduction//Cellular_Membrane_Organization//Cellular_Membrane_Organization                                                                                                                                                                                                                                        |
| CYCLIND1    | CCND1       | 1.80                | 6.93                 | Signal_Transduction//Response_To_UV//Response_To_Steroid_Hormone_Stimulus//DNA_Damage_Response_Signal_Transduction//Mammary_Gland_Development//DNA_Integrity_Checkpoint//DNA_Damage_Checkpoint                                                                                                                             |
| BECLIN      | BECN1       | 0.89                | 6.61                 | Cellular_Component_Biogenesis//Response_To_Starvation                                                                                                                                                                                                                                                                      |
| CD49B       | ITGA2       | 1.91                | 6.20                 | Mammary_Gland_Development//Response_To_Mechanical_Stimulus                                                                                                                                                                                                                                                                 |
| BCLXL       | BCL2L1      | 1.97                | 6.15                 | Cellular_Membrane_Organization//Cellular_Membrane_Organization//Ovulation_Cycle//Ovulation_Cycle_Process                                                                                                                                                                                                                   |
| GATA3       | GATA3       | 1.57                | 5.64                 | Response_To_Steroid_Hormone_Stimulus                                                                                                                                                                                                                                                                                       |
| CMETPY1235  | MET         | 1.29                | 5.17                 | Signal_Transduction//Phosphorylation//Transmembrane_Receptor_Protein_Tyrosine_Kinase_Activity                                                                                                                                                                                                                              |
| CHK1        | CHEK1       | 1.18                | 5.16                 | Signal_Transduction//Phosphorylation//DNA_Repair//DNA_Damage_Response_Signal_Transduction//DNA_Integrity_Checkpoint//DNA_Damage_Checkpoint                                                                                                                                                                                 |
| CDK1        | CDK1        | 1.71                | 5.07                 | Signal_Transduction//Cellular_Component_Biogenesis//Phosphorylation//Regulation_Of_DNA_Metabolic_Process//DNA_Damage_Response_Signal_Transduction//DNA_Integrity_Checkpoint//DNA_Damage_Checkpoint//Positive_Regulation_Of_DNA_Metabolic_Process//Regulation_Of_DNA_Replication//Regulation_Of_Protein_Import_Into_Nucleus |
| XRCC1       | XRCC1       | 1.19                | 4.83                 | DNA_Repair                                                                                                                                                                                                                                                                                                                 |
| CLAUDIN7    | CLDN7       | 1.60                | 4.65                 | Cell_Cell_Junction                                                                                                                                                                                                                                                                                                         |
| SMAD4       | SMAD4       | 1.87                | 4.52                 | Cellular_Component_Biogenesis//Signal_Transduction//Regulation_Of_Anatomical_Structure_Morphogenesis//Regulation_Of_Protein_Import_Into_Nucleus                                                                                                                                                                            |
| EGFR        | EGFR        | 3.13                | 4.44                 | Signal_Transduction//Phosphorylation//Cellular_Membrane_Organization//Cellular_Membrane_Organization//Double_Stranded_DNA_Binding//Gland_Morphogenesis//Ovulation_Cycle//Phosphatase_Binding//Regulation_Of_Protein_Import_Into_Nucleus//Transmembrane_Receptor_Protein_Tyrosine_Kinase_Activity//Response_To_UV           |
| MRE11       | MRE11A      | 1.49                | 4.35                 | Regulation_Of_DNA_Metabolic_Process//DNA_Repair//Regulation_Of_DNA_Replication//Double_Stranded_DNA_Binding//Double_Strand_Break_Repair                                                                                                                                                                                    |
| RAD51       | RAD51       | 3.28                | 4.04                 | Cellular_Component_Biogenesis//Regulation_Of_DNA_Metabolic_Process//DNA_Repair//Double_Stranded_DNA_Binding//Positive_Regulation_Of_DNA_Metabolic_Process//Double_Strand_Break_Repair                                                                                                                                      |
| FIBRONECTIN | FN1         | 2.02                | 3.87                 | Regulation_Of_Anatomical_Structure_Morphogenesis                                                                                                                                                                                                                                                                           |
| P27PT157    | IFI27       | 0.72                | 3.78                 | Activation_Of_Caspase_Activity                                                                                                                                                                                                                                                                                             |
| 1433EPSILON | YWHAE       | 0.93                | 3.73                 | Negative_Regulation_Of_Phosphorus_Metabolic_Process//Negative_Regulation_Of_Phosphate_Metabolic_Process                                                                                                                                                                                                                    |
| BID         | BID         | 2.71                | 3.72                 | Cellular_Membrane_Organization//Cellular_Membrane_Organization                                                                                                                                                                                                                                                             |
| YB1         | YBX1        | 1.49                | 3.34                 | Double_Stranded_DNA_Binding                                                                                                                                                                                                                                                                                                |
| HER2PY1248  | ERBB2       | 5.37                | 3.13                 | Signal_Transduction//Phosphorylation//Regulation_Of_Anatomical_Structure_Morphogenesis//Mammary_Gland_Development//Response_To_Steroid_Hormone_Stimulus//Gland_Morphogenesis//Phosphatase_Binding//Transmembrane_Receptor_Protein_Tyrosine_Kinase_Activity//Ovulation_Cycle_Process//Ovulation_Cycle                       |
| IRS1        | IRS1        | 1.35                | 3.08                 | Signal_Transduction//Cellular_Component_Biogenesis//Mammary_Gland_Development//Transmembrane_Receptor_Protein_Tyrosine_Kinase_Activity                                                                                                                                                                                     |
| PCNA        | PCNA        | 1.02                | 3.06                 | Signal_Transduction//Regulation_Of_DNA_Metabolic_Process//DNA_Repair//Double_Stranded_DNA_Binding//Regulation_Of_DNA_Replication                                                                                                                                                                                           |
| INPP4B      | INPP4B      | 1.15                | 3.02                 | Signal_Transduction                                                                                                                                                                                                                                                                                                        |
| CASPASE7CLE | CASP7       | 1.85                | 3.01                 | Response_To_UV                                                                                                                                                                                                                                                                                                             |
| AVEDD198    |             |                     |                      |                                                                                                                                                                                                                                                                                                                            |

|                 |        |       |      |                                                                                                                                                                                                                                                                                                                                                                                                                                                    |
|-----------------|--------|-------|------|----------------------------------------------------------------------------------------------------------------------------------------------------------------------------------------------------------------------------------------------------------------------------------------------------------------------------------------------------------------------------------------------------------------------------------------------------|
| LKB1            | STK11  | 0.65  | 2.94 | Phosphorylation                                                                                                                                                                                                                                                                                                                                                                                                                                    |
| PR              | PGR    | 0.27  | 2.90 | Signal_Transduction//Mammary_Gland_Development//Gland_Morphogenesis//Ovulation_Cycle_Process//Ovulation_Cycle                                                                                                                                                                                                                                                                                                                                      |
| P90RSKPT359S363 | TFRC   | 1.49  | 2.67 | Cellular_Membrane_Organization//Cellular_Membrane_Organization                                                                                                                                                                                                                                                                                                                                                                                     |
| P53             | TP53   | 2.13  | 2.65 | Signal_Transduction//Cellular_Component_Biogenesis//Regulation_Of_DNA_Metabolic_Process//Cellular_Membrane_Organization//DNA_Repair//Cellular_Membrane_Organization//DNA_Damage_Response_Signal_Transduction//Double_Stranded_DNA_Binding//Regulation_Of_DNA_Replication//DNA_Integrity_Checkpoint//DNA_Damage_Checkpoint//Double_Strand_Break_Repair//Activation_Of_Caspase_Activity//Response_To_Starvation//Phosphatase_Binding//Response_To_UV |
| SHCPY317        | SHC1   | 2.99  | 2.61 | Signal_Transduction//Regulation_Of_DNA_Metabolic_Process//Phosphorylation//Positive_Regulation_Of_DNA_Metabolic_Process//Regulation_Of_DNA_Replication                                                                                                                                                                                                                                                                                             |
| SRCPY416        | SRC    | 4.18  | 2.61 | Signal_Transduction//Cellular_Component_Biogenesis//Phosphorylation                                                                                                                                                                                                                                                                                                                                                                                |
| HSP70           | HSPA4  | 6.75  | 2.58 | Cellular_Component_Biogenesis//Cellular_Membrane_Organization//Cellular_Membrane_Organization                                                                                                                                                                                                                                                                                                                                                      |
| EGFRPY1068      | EGFR   | 10.15 | 2.57 | Signal_Transduction//Phosphorylation//Cellular_Membrane_Organization//Cellular_Membrane_Organization//Double_Stranded_DNA_Binding//Gland_Morphogenesis//Ovulation_Cycle//Phosphatase_Binding//Regulation_Of_Protein_Import_Into_Nucleus//Transmembrane_Receptor_Protein_Tyrosine_Kinase_Activity//Response_To_UV                                                                                                                                   |
| CHK1PS345       | CHEK1  | 0.44  | 2.51 | Signal_Transduction//Phosphorylation//DNA_Repair//DNA_Damage_Response_Signal_Transduction//DNA_Integrity_Checkpoint//DNA_Damage_Checkpoint                                                                                                                                                                                                                                                                                                         |
| BAK             | BAK1   | 3.33  | 2.47 | Cellular_Membrane_Organization//Cellular_Membrane_Organization                                                                                                                                                                                                                                                                                                                                                                                     |
| FOXO3A          | FOXO3  | 2.68  | 2.39 | Ovulation_Cycle_Process//Ovulation_Cycle                                                                                                                                                                                                                                                                                                                                                                                                           |
| NCADHERIN       | CDH2   | 1.14  | 2.37 | Cellular_Component_Biogenesis//Regulation_Of_Anatomical_Structure_Morphogenesis//Cell_Cell_Junction//Phosphatase_Binding                                                                                                                                                                                                                                                                                                                           |
| CJUNPS73        | JUN    | 1.39  | 2.36 | Signal_Transduction//Negative_Regulation_Of_Phosphorus_Metabolic_Process//Negative_Regulation_Of_Phosphate_Metabolic_Process//Response_To_Starvation//Positive_Regulation_Of_DNA_Metabolic_Process//Response_To_Mechanical_Stimulus//Regulation_Of_DNA_Metabolic_Process//Double_Stranded_DNA_Binding//Regulation_Of_DNA_Replication                                                                                                               |
| EGFRPY1173      | EGFR   | 11.55 | 2.34 | Signal_Transduction//Phosphorylation//Cellular_Membrane_Organization//Cellular_Membrane_Organization//Double_Stranded_DNA_Binding//Gland_Morphogenesis//Ovulation_Cycle//Phosphatase_Binding//Regulation_Of_Protein_Import_Into_Nucleus//Transmembrane_Receptor_Protein_Tyrosine_Kinase_Activity//Response_To_UV                                                                                                                                   |
| ECADHERIN       | CDH1   | 5.56  | 2.31 | Signal_Transduction//Cellular_Component_Biogenesis//DNA_Repair//Regulation_Of_Anatomical_Structure_Morphogenesis//Cell_Cell_Junction//Regulation_Of_Protein_Import_Into_Nucleus//DNA_Damage_Response_Signal_Transduction//DNA_Integrity_Checkpoint//Phosphatase_Binding//DNA_Damage_Checkpoint//Gland_Morphogenesis                                                                                                                                |
| RAD50           | RAD50  | 6.15  | 2.22 | Regulation_Of_DNA_Metabolic_Process//DNA_Repair//Double_Strand_Break_Repair                                                                                                                                                                                                                                                                                                                                                                        |
| LCK             | LCK    | 0.90  | 2.19 | Phosphorylation//Activation_Of_Caspase_Activity                                                                                                                                                                                                                                                                                                                                                                                                    |
| ERALPHA         | ESR1   | 2.76  | 2.14 | Signal_Transduction//Regulation_Of_Anatomical_Structure_Morphogenesis//Mammary_Gland_Development//Response_To_Steroid_Hormone_Stimulus//Gland_Morphogenesis//Ovulation_Cycle_Process//Ovulation_Cycle                                                                                                                                                                                                                                              |
| PCADHERIN       | CDH3   | 0.58  | 1.96 | Cell_Cell_Junction                                                                                                                                                                                                                                                                                                                                                                                                                                 |
| P27             | IFI27  | 1.15  | 1.94 | Activation_Of_Caspase_Activity                                                                                                                                                                                                                                                                                                                                                                                                                     |
| BAX             | BAX    | 0.73  | 1.74 | Cellular_Component_Biogenesis//Regulation_Of_Anatomical_Structure_Morphogenesis//Cellular_Membrane_Organization//Cellular_Membrane_Organization//Activation_Of_Caspase_Activity                                                                                                                                                                                                                                                                    |
| CHK2PT68        | CHEK2  | 0.96  | 1.72 | Signal_Transduction//Phosphorylation//DNA_Damage_Response_Signal_Transduction//DNA_Integrity_Checkpoint//DNA_Damage_Checkpoint                                                                                                                                                                                                                                                                                                                     |
| IGFBP2          | IGFBP2 | 1.50  | 1.57 | Signal_Transduction//Response_To_Mechanical_Stimulus//Response_To_Steroid_Hormone_Stimulus                                                                                                                                                                                                                                                                                                                                                         |
| ACCP579         | BMS1   | 1.42  | 1.56 | Cellular_Component_Biogenesis                                                                                                                                                                                                                                                                                                                                                                                                                      |



|           |      |      |      |                                                                                                                                                                                                                                                                                                                                                                            |
|-----------|------|------|------|----------------------------------------------------------------------------------------------------------------------------------------------------------------------------------------------------------------------------------------------------------------------------------------------------------------------------------------------------------------------------|
| CAVEOLIN1 | CAV1 | 2.22 | 1.44 | Signal_Transduction//Cellular_Component_Biogenesis//Negative_Regulation_Of_Phosphorus_Metabolic_Process//Negative_Regulation_Of_Phosphate_Metabolic_Process//Mammary_Gland_Development//Cellular_Membrane_Organization//Cellular_Membrane_Organization//Response_To_Mechanical_Stimulus//Response_To_Starvation//Response_To_Steroid_Hormone_Stimulus//Gland_Morphogenesis |
| SRC       | SRC  | 0.63 | 1.43 | Signal_Transduction//Cellular_Component_Biogenesis//Phosphorylation                                                                                                                                                                                                                                                                                                        |
| YAP       | YAP1 | 1.03 | 1.33 | Signal_Transduction                                                                                                                                                                                                                                                                                                                                                        |
| PAXILLIN  | PXN  | 0.84 | 1.32 | Signal_Transduction//Cellular_Component_Biogenesis                                                                                                                                                                                                                                                                                                                         |

---

**Supplementary Table 4. Blood routine analysis in blood samples of mice bearing orthotopic glioma at the end of experiment.**

| <b>Group</b> | <b>WBC (K/<math>\mu</math>L)</b> | <b>RBC (M/<math>\mu</math>L)</b> | <b>Hbg (g/L)</b>  | <b>Plt (<math>\times 10^9</math>/L)</b> |
|--------------|----------------------------------|----------------------------------|-------------------|-----------------------------------------|
| Control      | 8.41 $\pm$ 0.11                  | 10.21 $\pm$ 0.33                 | 146.31 $\pm$ 2.21 | 1060.98 $\pm$ 33.29                     |
| TMZ          | 8.87 $\pm$ 0.29                  | 10.90 $\pm$ 0.21                 | 141.01 $\pm$ 0.30 | 982.52 $\pm$ 66.61                      |
| TMZ+EBP      | 9.08 $\pm$ 0.21                  | 9.93 $\pm$ 0.26                  | 151.22 $\pm$ 1.29 | 990.35 $\pm$ 56.98                      |
| TMZ+MBP      | 7.95 $\pm$ 0.21                  | 9.92 $\pm$ 0.28                  | 140 $\pm$ 0.91    | 1103.25 $\pm$ 59.01                     |
| TMZ+BIP      | 8.93 $\pm$ 0.16                  | 10.18 $\pm$ 0.29                 | 143.12 $\pm$ 1.95 | 977.69 $\pm$ 51.40                      |

TMZ+EBP: TMZ combined with EBP-MPC-NP; TMZ+MBP: TMZ combined with MBP-MPC-NP; TMZ+BIP: TMZ combined with BIP-MPC-NP. Data was shown as mean $\pm$ S.D. N = 10.

**Supplementary Table 5. Values of serum enzymes in blood samples of mice treated with nanoparticles.**

| <b>Group</b> | <b>ALT<br/>(U/L)</b> | <b>AST<br/>(U/L)</b> | <b>BUN<br/>(mmol/L)</b> | <b>CREA<br/>(<math>\mu</math>mol/L)</b> | <b>TBIL<br/>(<math>\mu</math>mol/L)</b> |
|--------------|----------------------|----------------------|-------------------------|-----------------------------------------|-----------------------------------------|
| Control      | 43.5 $\pm$ 1.18      | 231.6 $\pm$ 1.86     | 8.13 $\pm$ 0.32         | 11.17 $\pm$ 0.3                         | 2.19 $\pm$ 0.4                          |
| TMZ          | 45.9 $\pm$ 2.10      | 232.3 $\pm$ 3.77     | 8.23 $\pm$ 0.22         | 11.23 $\pm$ 0.38                        | 2.84 $\pm$ 0.53                         |
| TMZ+EBP      | 43.4 $\pm$ 2.70      | 234 $\pm$ 3.50       | 8.36 $\pm$ 0.24         | 11.6 $\pm$ 0.35                         | 2.28 $\pm$ 0.66                         |
| TMZ+MBP      | 46 $\pm$ 2.02        | 231.8 $\pm$ 1.62     | 8.55 $\pm$ 0.33         | 11.99 $\pm$ 0.41                        | 2.48 $\pm$ 0.33                         |
| TMZ+BIP      | 47.9 $\pm$ 2.03      | 237.5 $\pm$ 4.59     | 8.38 $\pm$ 0.24         | 11.15 $\pm$ 0.36                        | 2.79 $\pm$ 0.42                         |

TMZ+EBP: TMZ combined with EBP-MPC-NP; TMZ+MBP: TMZ combined with MBP-MPC-NP; TMZ+BIP: TMZ combined with BIP-MPC-NP. Data was shown as mean $\pm$ S.D. N = 10.

**Supplementary Table 6. The primers used for PCR and qPCR.**

| <b>Target</b>    |                | <b>Sequence</b>      | <b>Appilication</b> |
|------------------|----------------|----------------------|---------------------|
| <i>CHEK1</i> pro | Forward Primer | GAGTCCCAGCCCTTCCTTTC | PCR                 |
|                  | Reserve Primer | AAATTCTGCCCTCCTCAGGC |                     |
| <i>CHEK2</i> pro | Forward Primer | GACCCAGGAGTGGTAGGTCT | PCR                 |
|                  | Reserve Primer | GCCAGCTTTACCTCTCCACA |                     |
| <i>RAD50</i> pro | Forward Primer | CCTGAAGCAGTCTCGGAAGG | PCR                 |
|                  | Reserve Primer | TCCCGGTATCGTGGGATTCT |                     |
| <i>RAD51</i> pro | Forward Primer | GGCGAAAACACAAGTGGACC | PCR                 |
|                  | Reserve Primer | CCGCTCTGATCTCGGACTTC |                     |
| <i>TP53</i> pro  | Forward Primer | GCGCTTCTCGCCAAGATAGA | PCR                 |
|                  | Reserve Primer | AGCGGACGCCAATTCTTTTG |                     |
| E2F1 mRNA        | Forward Primer | CACTTTCGGCCCTTTTGCTC | PCR/qPCR            |
|                  | Reserve Primer | GATTCCCCAGGCTCACCAAA |                     |
| GAPDH mRNA       | Forward Primer | GAAGGTGAAGGTCCGAGTC  | PCR/qPCR            |
|                  | Reserve Primer | GAAGATGGTGATGGGATTTC |                     |

**Supplementary Table 7. The antibodies used for Western blot, Immunohistochemistry, Immunofluorescence and ChIP.**

| <b>Primary antibodies</b> |             |                           |                                                                                 |
|---------------------------|-------------|---------------------------|---------------------------------------------------------------------------------|
| <b>Target</b>             | <b>Cat.</b> | <b>Manufactory</b>        | <b>Application (Concentration)</b>                                              |
| EGFR                      | ab52894     | Abcam                     | Western blot (1:1000); Immunohistochemistry (1:100); Immunofluorescence (1:200) |
| p-EGFR                    | S.684.2     | ThermoFisher              | Immunofluorescence (1:200)                                                      |
| p-EGFR                    | #3777       | Cell signaling technology | Western blot (1:1000); Immunohistochemistry (1:100)                             |
| MET                       | A10199      | Abclonal                  | Immunohistochemistry (1:100); Immunofluorescence (1:200)                        |
| MET                       | #8198       | Cell signaling technology | Western blot (1:1000)                                                           |
| p-MET                     | #3077       | Cell signaling technology | Western blot (1:1000); Immunohistochemistry (1:100); Immunofluorescence (1:200) |
| AKT                       | #2920       | Cell signaling technology | Western blot (1:1000)                                                           |
| p-AKT                     | #4060       | Cell signaling technology | Western blot (1:1000)                                                           |
| p38                       | 14064-1-AP  | Proteintech               | Western blot (1:1000)                                                           |
| p-p38                     | #4511       | Cell signaling technology | Western blot (1:1000)                                                           |
| STAT3                     | #9139       | Cell signaling technology | Western blot (1:1000)                                                           |
| p-STAT3                   | #9145       | Cell signaling technology | Western blot (1:1000)                                                           |
| p65                       | #8242       | Cell signaling technology | Western blot (1:1000)                                                           |
| p-p65                     | #3033       | Cell signaling technology | Western blot (1:1000)                                                           |
| CHEK1                     | A7653       | Abclonal                  | Western blot (1:1000); Immunohistochemistry (1:100); Immunofluorescence (1:200) |
| CHEK2                     | #3440       | Cell signaling technology | Western blot (1:1000); Immunohistochemistry (1:100); Immunofluorescence (1:200) |
| RAD50                     | ab89        | Abcam                     | Western blot (1:1000); Immunohistochemistry (1:100); Immunofluorescence (1:200) |
| RAD51                     | ab133534    | Abcam                     | Western blot (1:1000); Immunohistochemistry (1:100); Immunofluorescence (1:200) |
| TP53                      | #2527       | Cell signaling technology | Western blot (1:1000); Immunohistochemistry (1:100); Immunofluorescence (1:200) |
| TTP                       | 12737-1-AP  | Proteintech               | Western blot (1:1000)                                                           |
| E2F1                      | 12171-1-AP  | Proteintech               | Western blot (1:1000)                                                           |
| E2F1                      | ab4070      | Abcam                     | ChIP-seq (5 $\mu$ g in total)                                                   |
| $\gamma$ H2AX             | ab2893      | Abcam                     | Western blot (1:1000); Immunohistochemistry (1:100)                             |

GAPDH

60004-1-Ig

Proteintech

Western blot (1:1000)

| <b>Secondary antibodies</b>                                                          |             |                    |                                    |
|--------------------------------------------------------------------------------------|-------------|--------------------|------------------------------------|
| <b>Target</b>                                                                        | <b>Cat.</b> | <b>Manufactory</b> | <b>Application (Concentration)</b> |
| HRP-conjugated Affinipure Goat Anti-Rabbit IgG(H+L)                                  | SA00001-2   | Proteintech        | Western blot (1:4000)              |
| HRP-conjugated Affinipure Goat Anti-mouse IgG(H+L)                                   | ZDR-5307    | ZSGB-BIO           | Western blot (1:4000)              |
| Multimeric anti-rabbit/mouse IgG-HRP                                                 | SV0004      | BOSTER             | Immunohistochemistry               |
| Goat anti-Rabbit IgG (H+L) Highly Cross-Adsorbed Secondary Antibody, Alexa Fluor 488 | A11034      | ThermoFisher       | Immunofluorescence (1:1000)        |
| Goat anti-Rabbit IgG (H+L) Highly Cross-Adsorbed Secondary Antibody, Alexa Fluor 594 | A11037      | ThermoFisher       | Immunofluorescence (1:1000)        |
| Goat anti-Mouse IgG (H+L) Highly Cross-Adsorbed Secondary Antibody, Alexa Fluor 488  | A11029      | ThermoFisher       | Immunofluorescence (1:1000)        |
| Goat anti-Mouse IgG (H+L) Highly Cross-Adsorbed Secondary Antibody, Alexa Fluor 594  | A11032      | ThermoFisher       | Immunofluorescence (1:1000)        |
