# Supplementary material for: Dual functionalized brain-targeting nanoinhibitors restrain temozolomide-resistant glioma via attenuating EGFR and MET signaling pathways
Source: PubMed Central journal article supplement (PMC6992617; doi:10.1038/s41467-019-14036-x), 2020-01-30
Supplement: 41467_2019_14036_MOESM3_ESM.pdf [file 41467_2019_14036_MOESM3_ESM.pdf]

## **Description of Additional Supplementary Files**

File Name: Supplementary Data 1

Description: The CNV data of RTK genes in LGG and GBM.

File Name: Supplementary Data 2

Description: The differential expressed RTK genes between LN229 and LN229R.
